# Supplementary material for: An investigation of the effect of carbon support on ruthenium/carbon catalysts for lactic acid and butanone hydrogenation
Source: Royal Society of Chemistry journal article supplement (doi:10.1039/c6cp01311b), 2016-01-01
Supplement: c6cp01311b1.pdf [file c6cp01311b1.pdf]

Supporting information for

**An investigation of the effect of carbon support on ruthenium/carbon catalysts for lactic acid and butanone hydrogenation.**

Daniel R. Jones<sup>a</sup>, Sarwat Iqbal<sup>a</sup>, Simon A. Kondrat<sup>a</sup>, Giacomo M. Lari<sup>a</sup>, Peter J. Miedziak, David J. Morgan<sup>a</sup>, Stewart F. Parker<sup>b,c</sup> and Graham J. Hutchings<sup>\*a</sup>

[\\*hutch@cardiff.ac.uk](mailto:hutch@cardiff.ac.uk)

<sup>a</sup>Cardiff Catalysis Institute, Main Building, Park place, Cardiff. CF10 3AT

<sup>b</sup>ISIS Facility, STFC Rutherford Appleton Laboratory, Chilton, Didcot, Oxon, OX11 0QX, UK.

<sup>c</sup>UK Catalysis Hub, Research Complex at Harwell, STFC Rutherford Appleton Laboratory, Chilton, Didcot, Oxfordshire, OX11 0FA, UK.

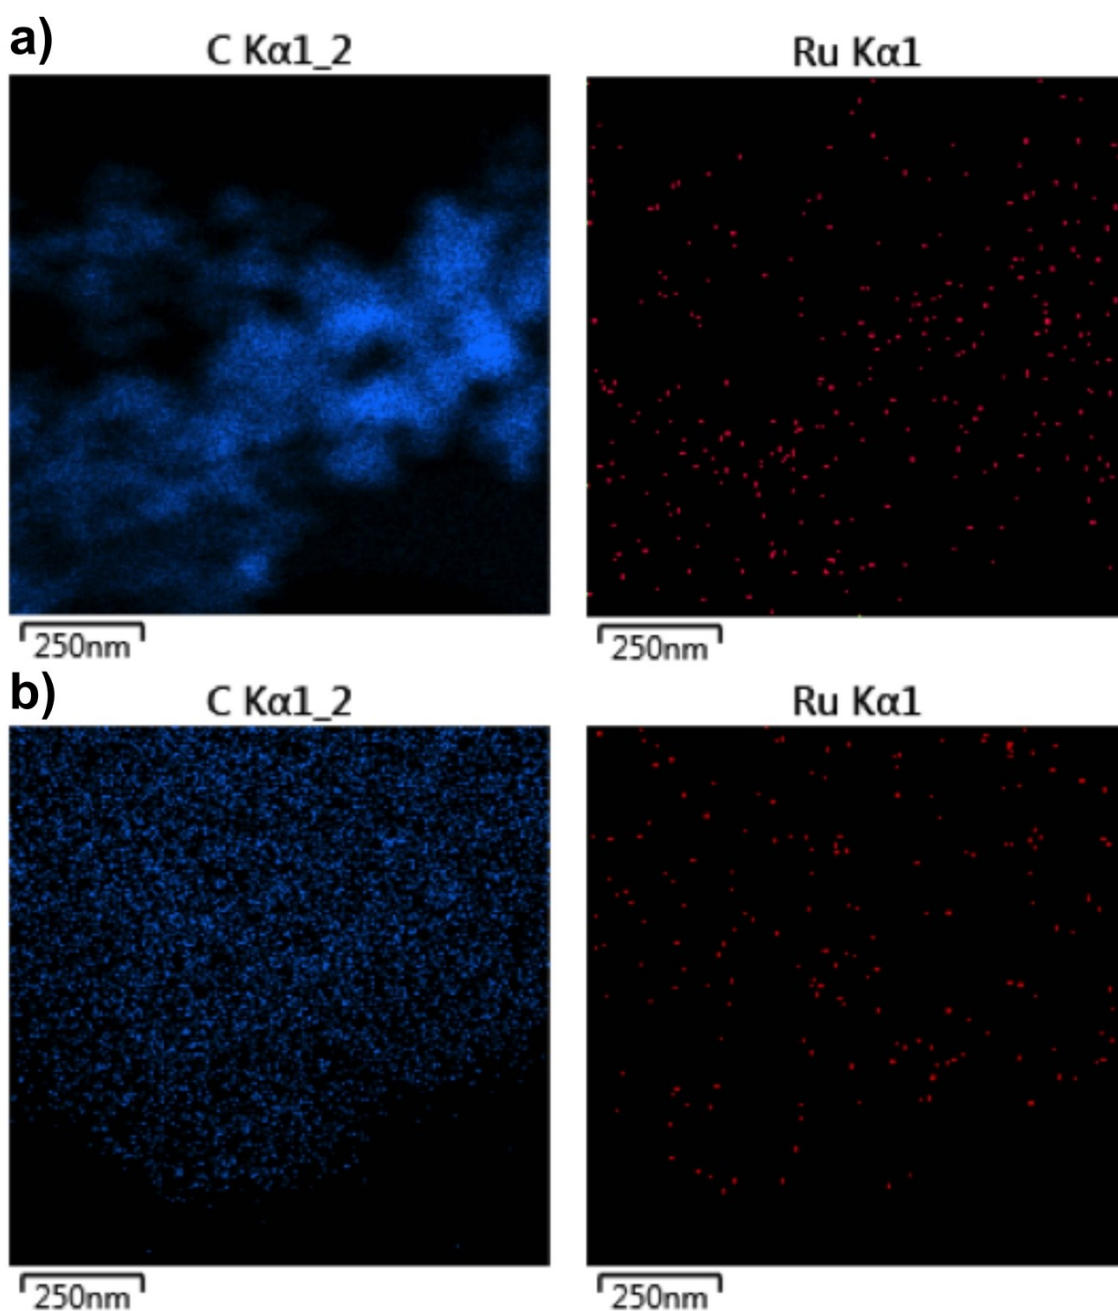

**Figure S1**, carbon and ruthenium EDX maps for G60 supported catalysts, a) RuCl<sub>3</sub> precursor, RuNO(NO<sub>3</sub>)<sub>3</sub>

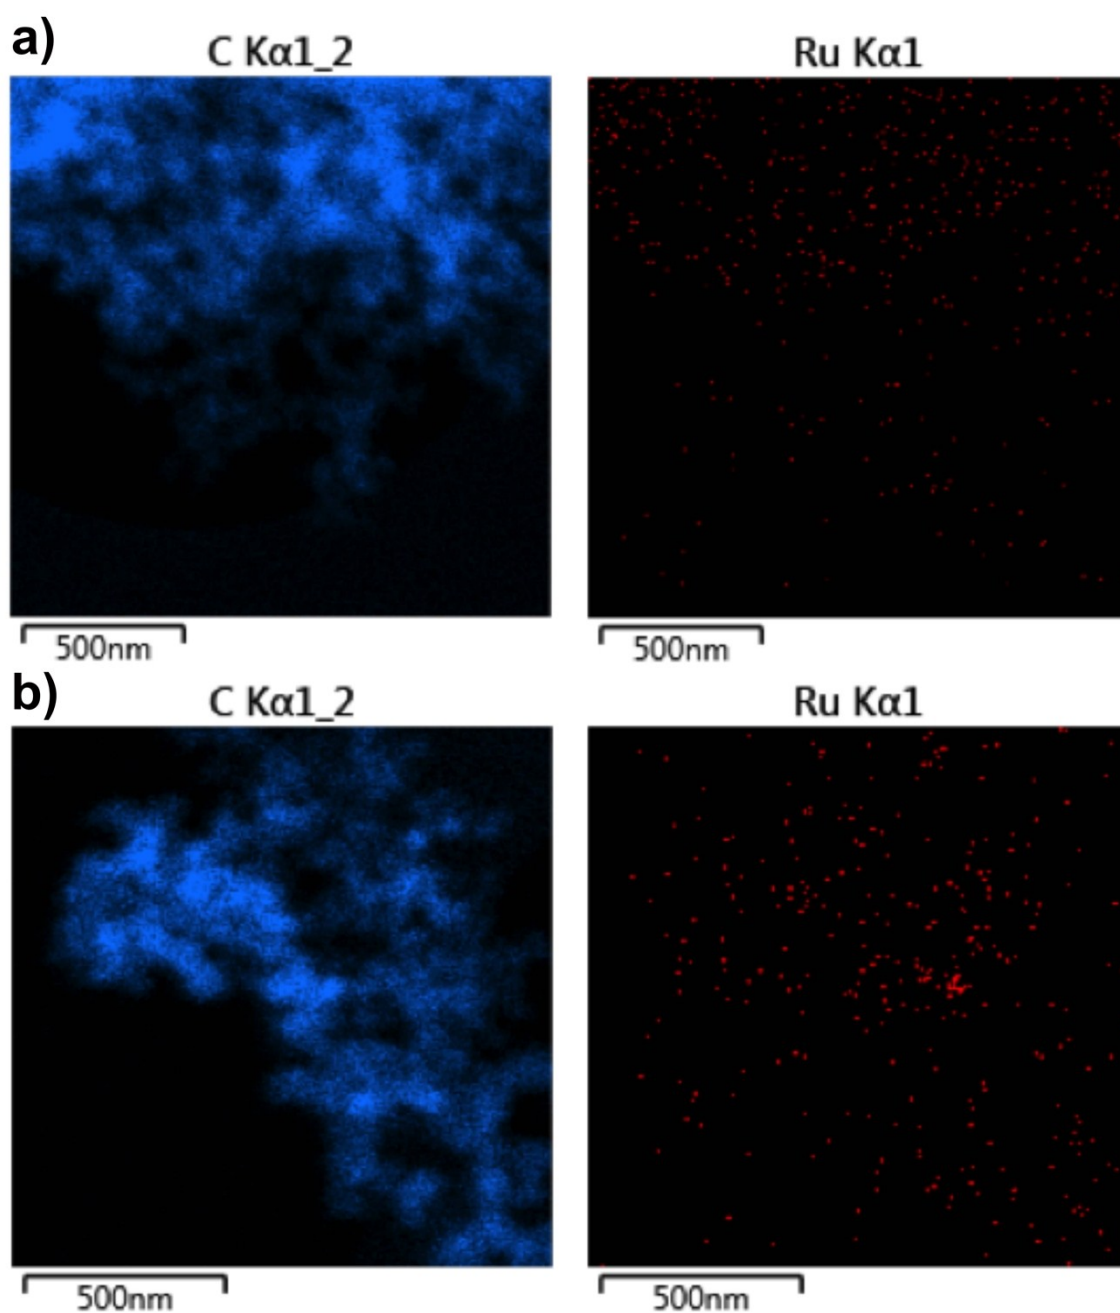

**Figure S2**, carbon and ruthenium EDX maps for XC72R supported catalysts, a)  $\text{RuCl}_3$  precursor,  $\text{RuNO}(\text{NO}_3)_3$

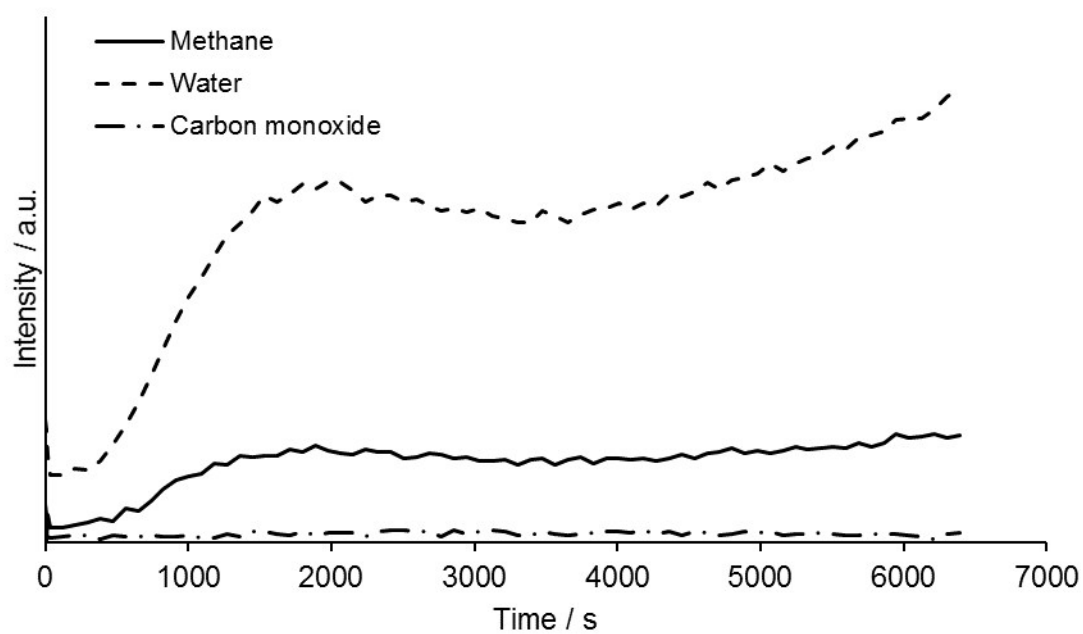

**Figure S3**, Mass spec signal of 1wt%Ru/XC72R made by the sol immobilisation technique with  $\text{RuCl}_2$ , recorded during TPR analysis.
